# Supplementary material for: Anti-Cancer Activity of Phytochemicals Targeting Hypoxia-Inducible Factor-1 Alpha
Source: MDPI journal article supplement (doi:10.3390/ijms22189819), 2021-09-10
Supplement: s1 [file s1]

## Anticancer Activity of Phytochemicals Targeting Hypoxia-Inducible Factor-1 Alpha

by Yun et al.

**Table S1.** The structure, source, and clinical trial status of phytochemicals.

| Phytochemical<br>(NCT number,<br>Condition/Disease,<br>Recruitment Status if<br>applicable)                                                                | Structure                                                                           | Source                                                                                      | Ref.  |
|------------------------------------------------------------------------------------------------------------------------------------------------------------|-------------------------------------------------------------------------------------|---------------------------------------------------------------------------------------------|-------|
| <b>Alkaloids</b>                                                                                                                                           |                                                                                     |                                                                                             |       |
| Berberine *<br>(NCT02226185, colorectal<br>cancer, completed)                                                                                              | 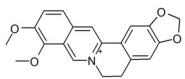   | Berberis species                                                                            | [1]   |
| Cyclopamine tartrate                                                                                                                                       |   | Derivative of cyclopamine, which is<br>from <i>Fritillaria</i> and <i>Veratrum</i> plant    | [2,3] |
| Dictamnine                                                                                                                                                 |  | The roots of <i>Dictamnus dasycarpus</i> Turcz                                              | [4]   |
| Nuciferine                                                                                                                                                 |  | <i>Nymphaea caerulea</i> and <i>Nelumbo nucifera</i>                                        | [5]   |
| Sanguinarine                                                                                                                                               |  | <i>Sanguinaria canadensis</i> , <i>Chelidonium<br/>majus</i> , and <i>Argemone Mexicana</i> | [6]   |
| Tetrandrine                                                                                                                                                |  | The roots of <i>Stephania tetrandra</i>                                                     | [7]   |
| <b>Organosulfurs</b>                                                                                                                                       |                                                                                     |                                                                                             |       |
| Diallyl trisulfide                                                                                                                                         |  | Garlic ( <i>Allium sativum</i> L)                                                           | [8]   |
| Sulforaphane *<br>(NCT03232138, lung cancer,<br>recruiting)<br>(NCT03665922, prostate cancer,<br>recruiting)<br>(NCT00982319, breast cancer,<br>completed) |  | Vegetables, such as cauliflower and<br>brussel sprouts                                      | [9]   |
| <b>Polyphenols (Flavonoids)</b>                                                                                                                            |                                                                                     |                                                                                             |       |

|                                                                                                                                  |                                                                                     |                                                                              |      |
|----------------------------------------------------------------------------------------------------------------------------------|-------------------------------------------------------------------------------------|------------------------------------------------------------------------------|------|
| Apigenin                                                                                                                         | 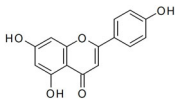   | Dried flowers of <i>Matricaria chamomilla</i>                                | [10] |
| Cardamonin                                                                                                                       |    | <i>Alpinia katsumadai</i>                                                    | [11] |
| Epigallocatechin-3-gallate (EGCG) *<br>(NCT02891538, colorectal cancer, recruiting)<br>(NCT00676780, prostate cancer, completed) |    | Green tea                                                                    | [12] |
| FV-429                                                                                                                           |    | A derivative of wogonin, which is from <i>Scutellaria baicalensis Georgi</i> | [13] |
| Oroxylin A                                                                                                                       |    | <i>Scutellaria baicalensis Georgi</i>                                        | [14] |
| Wogonin                                                                                                                          |    | <i>Scutellaria baicalensis Georgi</i>                                        | [15] |
| Y6                                                                                                                               |   | A derivative of Epigallocatechin-3-gallate (EGCG)                            | [16] |
| <b>Polyphenols (Lignans, Phenolic Acids, and Stilbenes)</b>                                                                      |                                                                                     |                                                                              |      |
| HS-1793                                                                                                                          |  | An analogue of resveratrol, which is from grapes and peanuts                 | [17] |
| LXY6090                                                                                                                          |  | A derivative of Manassantin A, which is from <i>Saururus cernuus</i> L.      | [18] |
| Magnolol                                                                                                                         |  | <i>Magnolia officinalis</i>                                                  | [19] |
| Manassantin A                                                                                                                    |  | <i>Saururus cernuus</i> L. (Saururaceae)                                     | [20] |
| Piceatannol                                                                                                                      |  | Various fruits and vegetables such as grapes                                 | [21] |

|                                                                                                                                                                                                                                               |                                                                                     |                                                                     |      |
|-----------------------------------------------------------------------------------------------------------------------------------------------------------------------------------------------------------------------------------------------|-------------------------------------------------------------------------------------|---------------------------------------------------------------------|------|
| Pterostilbene *<br>(NCT03671811, endometrial cancer, recruiting)                                                                                                                                                                              | 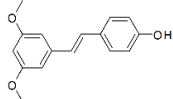   | Grapes and blueberries                                              | [22] |
| Resveratrol                                                                                                                                                                                                                                   |    | Grapes and peanuts                                                  | [23] |
| Rhaponticin                                                                                                                                                                                                                                   |    | Medicinal herbs such as <i>Rheum undulatum</i> L.                   | [24] |
| Vanillic acid                                                                                                                                                                                                                                 |    | <i>Angelica sinensis</i> and green tea                              | [25] |
| <b>Other Polyphenols</b>                                                                                                                                                                                                                      |                                                                                     |                                                                     |      |
| Chlorogenic acid                                                                                                                                                                                                                              |    | Potatoes and apples                                                 | [26] |
| Curcumin *<br>(NCT03980509, breast cancer, recruiting)<br>(NCT01294072, colorectal cancer, recruiting)<br>(NCT02064673, prostate cancer, recruiting)<br>(NCT04403568, prostate cancer, recruiting)<br>(NCT01740323, breast cancer, completed) |   | The rhizome of <i>Curcuma longa</i>                                 | [27] |
| Decursin                                                                                                                                                                                                                                      |  | The roots of <i>Angelica gigas</i>                                  | [28] |
| DPHP                                                                                                                                                                                                                                          |  | An analogue of alpinoid c, which is from <i>Alpinia officinarum</i> | [29] |
| Gambogic acid                                                                                                                                                                                                                                 |  | <i>Garcinia hanburyi</i>                                            | [30] |
| Garcinol                                                                                                                                                                                                                                      |  | The fruit rind of <i>Garcinia indica</i>                            | [31] |

|                                                                                                                           |                                                                                     |                                                                          |      |
|---------------------------------------------------------------------------------------------------------------------------|-------------------------------------------------------------------------------------|--------------------------------------------------------------------------|------|
| Imperatorin                                                                                                               | 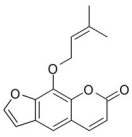   | <i>Angelica dahurica</i>                                                 | [32] |
| Salidroside                                                                                                               |    | <i>Rhodiola rosea</i> L.                                                 | [33] |
| Shikonin                                                                                                                  |    | The roots of <i>Lithospermum erythrorhizon</i>                           | [34] |
| Verbascoside                                                                                                              |    | Mullein ( <i>Verbascum sinuatum</i> L.;<br>Scrophulariaceae)             | [35] |
| <b>Terpenes</b>                                                                                                           |                                                                                     |                                                                          |      |
| $\beta$ -elemene *<br>(NCT02629757, anaplastic<br>oligoastrocytoma/anaplastic<br>astrocytoma/glioblastoma,<br>recruiting) |    | <i>Curcuma wenyujin</i>                                                  | [36] |
| Andrographolide *<br>(NCT04196075, esophageal<br>cancer, recruiting)                                                      |  | <i>Andrographis paniculata</i> Nees<br>(Acanthaceae)                     | [37] |
| Balanophorin B                                                                                                            |  | <i>Balanophora spicata</i> , <i>B. indica</i> , and <i>B. simaoensis</i> | [38] |
| Betulinic acid                                                                                                            |  | Plants such as white-barked birch trees                                  | [39] |
| Britannin                                                                                                                 |  | <i>Inula Britannica</i> L.                                               | [40] |
| Celastrol                                                                                                                 |  | <i>Tripterygium wilfordii</i> Hook F                                     | [41] |
| Cephalomannine                                                                                                            |  | <i>Taxus wallichiana</i> (yew species)                                   | [42] |
| Cryptotanshinone                                                                                                          |  | <i>Salvia miltiorrhiza</i> Bunge                                         | [43] |

|                                                                                                                                                                                                                             |                                                                                     |                                                        |      |
|-----------------------------------------------------------------------------------------------------------------------------------------------------------------------------------------------------------------------------|-------------------------------------------------------------------------------------|--------------------------------------------------------|------|
| Curcumol                                                                                                                                                                                                                    | 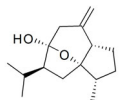   | <i>Curcuma wenyujin</i>                                | [44] |
| Ilexgenin A                                                                                                                                                                                                                 |    | <i>Ilex hainanensis</i> Merr                           | [45] |
| Kamebakaurin                                                                                                                                                                                                                |    | <i>Isodon excia</i> (Maxim.) Hara                      | [46] |
| Micheliolide                                                                                                                                                                                                                |    | <i>Michelia compressa</i> and <i>Michelia champaca</i> | [47] |
| Panaxadiol                                                                                                                                                                                                                  |    | The roots of <i>Panax ginseng</i>                      | [48] |
| Perillyl alcohol *<br>(NCT02704858, glioblastoma<br>multiforme, recruiting)<br>(NCT00003219, breast cancer,<br>completed)<br>(NCT00003238, prostate cancer,<br>completed)<br>(NCT00003769, pancreatic<br>cancer, completed) |    | Lavender, cherries, and mint                           | [49] |
| Pomolic acid                                                                                                                                                                                                                |  | <i>Euscaphis japonica</i>                              | [50] |
| Pristimerin                                                                                                                                                                                                                 |  | Celastraceae and Hippocrateaceae<br>families           | [51] |
| Tanshinone IIA                                                                                                                                                                                                              |  | The dried root of <i>Salvia miltiorrhiza</i>           | [52] |
| Theasaponin E1                                                                                                                                                                                                              |  | <i>Camellia sinensis</i> seeds                         | [53] |
| Thymoquinone                                                                                                                                                                                                                |  | <i>Nigella sativa</i> (black seed)                     | [54] |

|                                                                                                                                                                  |                                                                                   |                                                                                                             |
|------------------------------------------------------------------------------------------------------------------------------------------------------------------|-----------------------------------------------------------------------------------|-------------------------------------------------------------------------------------------------------------|
| Triptolide *<br>(NCT03129139, advanced solid cancers, recruiting)<br>(NCT04896073, pancreatic cancer, recruiting)<br>(NCT03117920, pancreatic cancer, completed) | 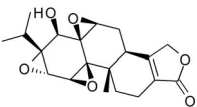 | <i>Tripterygium wilfordii</i> hook [55]                                                                     |
| Ursolic acid                                                                                                                                                     |  | A variety of natural plants, including <i>Hedyotis diffusa</i> Willd. and <i>Prunella avulgaris</i> L. [56] |

\* indicates compounds in clinical trials for cancer. The national clinical trial (NCT) number, condition/disease, and recruitment status registered in ClinicalTrials.gov are referred.

## Supplementary References

- Pan, Y.; Shao, D.; Zhao, Y.; Zhang, F.; Zheng, X.; Tan, Y.; He, K.; Li, J.; Chen, L. Berberine reverses hypoxia-induced chemoresistance in breast cancer through the inhibition of ampk- hif-1alpha. *Int J Biol Sci* **2017**, *13*, 794-803.
- Kalainayakan, S.P.; Ghosh, P.; Dey, S.; Fitzgerald, K.E.; Sohoni, S.; Konduri, P.C.; Garrossian, M.; Liu, L.; Zhang, L. Cyclopamine tartrate, a modulator of hedgehog signaling and mitochondrial respiration, effectively arrests lung tumor growth and progression. *Sci Rep* **2019**, *9*, 1405.
- Du, Y.; Zheng, Z.G.; Yu, Y.; Wu, Z.T.; Liang, D.; Li, P.; Jiang, Y.; Li, H.J. Rapid discovery of cyclopamine analogs from fritillaria and veratrum plants using lc-q-tof-ms and lc-qqq-ms. *J Pharm Biomed Anal* **2017**, *142*, 201-209.
- Wang, J.Y.; Wang, Z.; Li, M.Y.; Zhang, Z.; Mi, C.; Zuo, H.X.; Xing, Y.; Wu, Y.L.; Lian, L.H.; Xu, G.H., *et al.* Dictamnine promotes apoptosis and inhibits epithelial-mesenchymal transition, migration, invasion and proliferation by downregulating the hif-1alpha and slug signaling pathways. *Chem Biol Interact* **2018**, *296*, 134-144.
- Liu, R.M.; Xu, P.; Chen, Q.; Feng, S.L.; Xie, Y. A multiple-targets alkaloid nuciferine overcomes paclitaxel-induced drug resistance in vitro and in vivo. *Phytomedicine* **2020**, *79*, 153342.
- Su, Q.; Wang, J.; Wu, Q.; Ullah, A.; Ghauri, M.A.; Sarwar, A.; Chen, L.; Liu, F.; Zhang, Y. Sanguinarine combats hypoxia-induced activation of ephb4 and hif-1alpha pathways in breast cancer. *Phytomedicine* **2021**, *84*, 153503.
- Chen, Z.; Zhao, L.; Zhao, F.; Yang, G.; Wang, J.J. Tetrandrine suppresses lung cancer growth and induces apoptosis, potentially via the vegf/hif-1alpha/icam-1 signaling pathway. *Oncol Lett* **2018**, *15*, 7433-7437.
- Wei, Z.; Shan, Y.; Tao, L.; Liu, Y.; Zhu, Z.; Liu, Z.; Wu, Y.; Chen, W.; Wang, A.; Lu, Y. Diallyl trisulfides, a natural histone deacetylase inhibitor, attenuate hif-1alpha synthesis, and decreases breast cancer metastasis. *Mol Carcinog* **2017**, *56*, 2317-2331.
- Xia, Y.; Kang, T.W.; Jung, Y.D.; Zhang, C.; Lian, S. Sulforaphane inhibits nonmuscle invasive bladder cancer cells proliferation through suppression of hif-1alpha-mediated glycolysis in hypoxia. *J Agric Food Chem* **2019**, *67*, 7844-7854.
- Shankar, E.; Goel, A.; Gupta, K.; Gupta, S. Plant flavone apigenin: An emerging anticancer agent. *Curr Pharmacol Rep* **2017**, *3*, 423-446.
- Jin, J.; Qiu, S.; Wang, P.; Liang, X.; Huang, F.; Wu, H.; Zhang, B.; Zhang, W.; Tian, X.; Xu, R., *et al.* Cardamonin inhibits breast cancer growth by repressing hif-1alpha-dependent metabolic reprogramming. *J Exp Clin Cancer Res* **2019**, *38*, 377.
- Luo, H.Q.; Xu, M.; Zhong, W.T.; Cui, Z.Y.; Liu, F.M.; Zhou, K.Y.; Li, X.Y. Egcg decreases the expression of hif-1alpha and vegf and cell growth in mcf-7 breast cancer cells. *J BUON* **2014**, *19*, 435-439.
- Guo, Q.; Lu, L.; Liao, Y.; Wang, X.; Zhang, Y.; Liu, Y.; Huang, S.; Sun, H.; Li, Z.; Zhao, L. Influence of c-src on hypoxic resistance to paclitaxel in human ovarian cancer cells and reversal of fv-429. *Cell Death Dis* **2018**, *8*, e3178.

14. Wei, M.; Ma, R.; Huang, S.; Liao, Y.; Ding, Y.; Li, Z.; Guo, Q.; Tan, R.; Zhang, L.; Zhao, L. Oroxylin a increases the sensitivity of temozolomide on glioma cells by hypoxia-inducible factor 1alpha/hedgehog pathway under hypoxia. *J Cell Physiol* **2019**, *234*, 17392-17404.
15. Wang, S.J.; Zhao, J.K.; Ren, S.; Sun, W.W.; Zhang, W.J.; Zhang, J.N. Wogonin affects proliferation and the energy metabolism of sgc-7901 and a549 cells. *Exp Ther Med* **2019**, *17*, 911-918.
16. Wen, Y.; Zhao, R.Q.; Zhang, Y.K.; Gupta, P.; Fu, L.X.; Tang, A.Z.; Liu, B.M.; Chen, Z.S.; Yang, D.H.; Liang, G. Effect of y6, an epigallocatechin gallate derivative, on reversing doxorubicin drug resistance in human hepatocellular carcinoma cells. *Oncotarget* **2017**, *8*, 29760-29770.
17. Kim, D.H.; Sung, B.; Kim, J.A.; Kang, Y.J.; Hwang, S.Y.; Hwang, N.L.; Suh, H.; Choi, Y.H.; Im, E.; Chung, H.Y., et al. Hs-1793, a resveratrol analogue, downregulates the expression of hypoxia-induced hif-1 and vegf and inhibits tumor growth of human breast cancer cells in a nude mouse xenograft model. *Int J Oncol* **2017**, *51*, 715-723.
18. Lai, F.; Liu, Q.; Liu, X.; Ji, M.; Xie, P.; Chen, X. Lxy6090 - a novel manassantin a derivative - limits breast cancer growth through hypoxia-inducible factor-1 inhibition. *Onco Targets Ther* **2016**, *9*, 3829-3840.
19. Chen, M.C.; Lee, C.F.; Huang, W.H.; Chou, T.C. Magnolol suppresses hypoxia-induced angiogenesis via inhibition of hif-1alpha/vegf signaling pathway in human bladder cancer cells. *Biochem Pharmacol* **2013**, *85*, 1278-1287.
20. Kwak, S.H.; Stephenson, T.N.; Lee, H.E.; Ge, Y.; Lee, H.; Min, S.M.; Kim, J.H.; Kwon, D.Y.; Lee, Y.M.; Hong, J. Evaluation of manassantin a tetrahydrofuran core region analogues and cooperative therapeutic effects with egfr inhibition. *J Med Chem* **2020**, *63*, 6821-6833.
21. Aljabali, A.A.A.; Bakshi, H.A.; Hakkim, F.L.; Haggag, Y.A.; Al-Batanyeh, K.M.; Al Zoubi, M.S.; Al-Trad, B.; Nasef, M.M.; Satija, S.; Mehta, M., et al. Albumin nano-encapsulation of piceatannol enhances its anticancer potential in colon cancer via downregulation of nuclear p65 and hif-1alpha. *Cancers (Basel)* **2020**, *12*.
22. Butt, N.A.; Kumar, A.; Dhar, S.; Rimando, A.M.; Akhtar, I.; Hancock, J.C.; Lage, J.M.; Pound, C.R.; Lewin, J.R.; Gomez, C.R., et al. Targeting mta1/hif-1alpha signaling by pterostilbene in combination with histone deacetylase inhibitor attenuates prostate cancer progression. *Cancer Med* **2017**, *6*, 2673-2685.
23. Wang, H.; Jia, R.; Lv, T.; Wang, M.; He, S.; Zhang, X. Resveratrol suppresses tumor progression via inhibiting stat3/hif-1alpha/vegf pathway in an orthotopic rat model of non-small-cell lung cancer (nsccl). *Onco Targets Ther* **2020**, *13*, 7057-7063.
24. Kim, A.; Ma, J.Y. Rhaponticin decreases the metastatic and angiogenic abilities of cancer cells via suppression of the hif1alpha pathway. *Int J Oncol* **2018**, *53*, 1160-1170.
25. Gong, J.; Zhou, S.; Yang, S. Vanillic acid suppresses hif-1alpha expression via inhibition of mtor/p70s6k/4e-bp1 and raf/mek/erk pathways in human colon cancer hct116 cells. *Int J Mol Sci* **2019**, *20*.
26. Park, J.J.; Hwang, S.J.; Park, J.H.; Lee, H.J. Chlorogenic acid inhibits hypoxia-induced angiogenesis via down-regulation of the hif-1alpha/akt pathway. *Cell Oncol (Dordr)* **2015**, *38*, 111-118.
27. Monteleone, F.; Taverna, S.; Alessandro, R.; Fontana, S. Swath-ms based quantitative proteomics analysis reveals that curcumin alters the metabolic enzyme profile of cml cells by affecting the activity of mir-22/ipo7/hif-1alpha axis. *J Exp Clin Cancer Res* **2018**, *37*, 170.
28. Ge, Y.; Yoon, S.H.; Jang, H.; Jeong, J.H.; Lee, Y.M. Decursin promotes hif-1alpha proteasomal degradation and immune responses in hypoxic tumour microenvironment. *Phytomedicine* **2020**, *78*, 153318.
29. Velatooru, L.R.; Vakamullu, S.; Penugurti, V.; S, P.R. Alpinoid c analog inhibits angiogenesis and induces apoptosis in colo205cell line. *Chem Biol Interact* **2019**, *308*, 1-10.
30. Wang, F.; Zhang, W.; Guo, L.; Bao, W.; Jin, N.; Liu, R.; Liu, P.; Wang, Y.; Guo, Q.; Chen, B. Gambogic acid suppresses hypoxia-induced hypoxia-inducible factor-1alpha/vascular endothelial growth factor expression via inhibiting phosphatidylinositol 3-kinase/akt/mammalian target protein of rapamycin pathway in multiple myeloma cells. *Cancer Sci* **2014**, *105*, 1063-1070.
31. Ranjbarnejad, T.; Saidijam, M.; Tafakh, M.S.; Pourjafar, M.; Talebzadeh, F.; Najafi, R. Garcinol exhibits anti-proliferative activities by targeting microsomal prostaglandin e synthase-1 in human colon cancer cells. *Hum Exp Toxicol* **2017**, *36*, 692-700.
32. Mi, C.; Ma, J.; Wang, K.S.; Zuo, H.X.; Wang, Z.; Li, M.Y.; Piao, L.X.; Xu, G.H.; Li, X.; Quan, Z.S., et al. Imperatorin suppresses proliferation and angiogenesis of human colon cancer cell by targeting hif-1alpha via the mtor/p70s6k/4e-bp1 and mapk pathways. *J Ethnopharmacol* **2017**, *203*, 27-38.

33. Qin, Y.; Liu, H.J.; Li, M.; Zhai, D.H.; Tang, Y.H.; Yang, L.; Qiao, K.L.; Yang, J.H.; Zhong, W.L.; Zhang, Q., *et al.* Salidroside improves the hypoxic tumor microenvironment and reverses the drug resistance of platinum drugs via hif-1alpha signaling pathway. *EBioMedicine* **2018**, *38*, 25-36.
34. Li, M.Y.; Mi, C.; Wang, K.S.; Wang, Z.; Zuo, H.X.; Piao, L.X.; Xu, G.H.; Li, X.; Ma, J.; Jin, X. Shikonin suppresses proliferation and induces cell cycle arrest through the inhibition of hypoxia-inducible factor-1alpha signaling. *Chem Biol Interact* **2017**, *274*, 58-67.
35. Attia, Y.M.; El-Kersh, D.M.; Wagdy, H.A.; Elmazar, M.M. Verbascoside: Identification, quantification, and potential sensitization of colorectal cancer cells to 5-fu by targeting pi3k/akt pathway. *Sci Rep* **2018**, *8*, 16939.
36. Yu, X.; Li, Z.; Zhang, Y.; Xu, M.; Che, Y.; Tian, X.; Wang, R.; Zou, K.; Zou, L. Beta-elemene inhibits radiation and hypoxia-induced macrophages infiltration via prx-1/nf-kappab/hif-1alpha signaling pathway. *Onco Targets Ther* **2019**, *12*, 4203-4211.
37. Shi, L.; Zhang, G.; Zheng, Z.; Lu, B.; Ji, L. Andrographolide reduced vegfa expression in hepatoma cancer cells by inactivating hif-1alpha: The involvement of jnk and mta1/hdca. *Chem Biol Interact* **2017**, *273*, 228-236.
38. Dai, T.; Li, L.; Qi, W.; Liu, B.; Jiang, Z.; Song, J.; Hua, H. Balanophorin b inhibited glycolysis with the involvement of hif-1alpha. *Life Sci* **2021**, *267*, 118910.
39. Kim, H.J.; Cho, H.S.; Ban, H.S.; Nakamura, H. Suppression of hif-1alpha accumulation by betulinic acid through proteasome activation in hypoxic cervical cancer. *Biochem Biophys Res Commun* **2020**, *523*, 726-732.
40. Zhang, Y.F.; Zhang, Z.H.; Li, M.Y.; Wang, J.Y.; Xing, Y.; Ri, M.; Jin, C.H.; Xu, G.H.; Piao, L.X.; Zuo, H.X., *et al.* Britannin stabilizes t cell activity and inhibits proliferation and angiogenesis by targeting pd-l1 via abrogation of the crosstalk between myc and hif-1alpha in cancer. *Phytomedicine* **2021**, *81*, 153425.
41. Zhu, Y.; Liu, X.; Zhao, P.; Zhao, H.; Gao, W.; Wang, L. Celastrol suppresses glioma vasculogenic mimicry formation and angiogenesis by blocking the pi3k/akt/mtor signaling pathway. *Front Pharmacol* **2020**, *11*, 25.
42. Ullah, A.; Leong, S.W.; Wang, J.; Wu, Q.; Ghauri, M.A.; Sarwar, A.; Su, Q.; Zhang, Y. Cephalomannine inhibits hypoxia-induced cellular function via the suppression of apex1/hif-1alpha interaction in lung cancer. *Cell Death Dis* **2021**, *12*, 490.
43. Zhang, L.; Chen, C.; Duanmu, J.; Wu, Y.; Tao, J.; Yang, A.; Yin, X.; Xiong, B.; Gu, J.; Li, C., *et al.* Cryptotanshinone inhibits the growth and invasion of colon cancer by suppressing inflammation and tumor angiogenesis through modulating mmp/timp system, pi3k/akt/mtor signaling and hif-1alpha nuclear translocation. *Int Immunopharmacol* **2018**, *65*, 429-437.
44. Zuo, H.X.; Jin, Y.; Wang, Z.; Li, M.Y.; Zhang, Z.H.; Wang, J.Y.; Xing, Y.; Ri, M.H.; Jin, C.H.; Xu, G.H., *et al.* Curcuminol inhibits the expression of programmed cell death-ligand 1 through crosstalk between hypoxia-inducible factor-1alpha and stat3 (t705) signaling pathways in hepatic cancer. *J Ethnopharmacol* **2020**, *257*, 112835.
45. Zhang, L.; Qiao, X.; Chen, M.; Li, P.; Wen, X.; Sun, M.; Ma, X.; Hou, Y.; Yang, J. Ilexgenin a prevents early colonic carcinogenesis and reprogramed lipid metabolism through hif1alpha/srebp-1. *Phytomedicine* **2019**, *63*, 153011.
46. Wang, K.S.; Ma, J.; Mi, C.; Li, J.; Lee, J.J.; Jin, X. Kamebakaurin inhibits the expression of hypoxia-inducible factor-1alpha and its target genes to confer antitumor activity. *Oncol Rep* **2016**, *35*, 2045-2052.
47. Kong, P.; Yu, K.N.; Yang, M.; Almahi, W.A.; Nie, L.; Chen, G.; Han, W. Micheliolide enhances radiosensitivities of p53-deficient non-small-cell lung cancer via promoting hif-1alpha degradation. *Int J Mol Sci* **2020**, *21*.
48. Wang, Z.; Li, M.Y.; Zhang, Z.H.; Zuo, H.X.; Wang, J.Y.; Xing, Y.; Ri, M.; Jin, H.L.; Jin, C.H.; Xu, G.H., *et al.* Panaxadiol inhibits programmed cell death-ligand 1 expression and tumour proliferation via hypoxia-inducible factor (hif)-1alpha and stat3 in human colon cancer cells. *Pharmacol Res* **2020**, *155*, 104727.
49. Ma, J.; Li, J.; Wang, K.S.; Mi, C.; Piao, L.X.; Xu, G.H.; Li, X.; Lee, J.J.; Jin, X. Perillyl alcohol efficiently scavenges activity of cellular ros and inhibits the translational expression of hypoxia-inducible factor-1alpha via mtor/4e-bp1 signaling pathways. *Int Immunopharmacol* **2016**, *39*, 1-9.
50. Park, J.H.; Yoon, J.; Park, B. Pomolic acid suppresses hif1alpha/vegf-mediated angiogenesis by targeting p38-mapk and mtor signaling cascades. *Phytomedicine* **2016**, *23*, 1716-1726.
51. Costa, P.M.; Ferreira, P.M.; Bolzani Vda, S.; Furlan, M.; de Freitas Formenton Macedo Dos Santos, V.A.; Corsino, J.; de Moraes, M.O.; Costa-Lotufo, L.V.; Montenegro, R.C.; Pessoa, C. Antiproliferative activity of pristimerin isolated from maytenus ilicifolia (celastraceae) in human hl-60 cells. *Toxicol In Vitro* **2008**, *22*, 854-863.
52. Li, G.; Shan, C.; Liu, L.; Zhou, T.; Zhou, J.; Hu, X.; Chen, Y.; Cui, H.; Gao, N. Tanshinone iia inhibits hif-1alpha and vegf expression in breast cancer cells via mtor/p70s6k/rps6/4e-bp1 signaling pathway. *PLoS One* **2015**, *10*, e0117440.



53. Li, B.; Tong, T.; Ren, N.; Rankin, G.O.; Rojanasakul, Y.; Tu, Y.; Chen, Y.C. Theasaponin e1 inhibits platinum-resistant ovarian cancer cells through activating apoptosis and suppressing angiogenesis. *Molecules* **2021**, *26*.
54. Lee, Y.M.; Kim, G.H.; Park, E.J.; Oh, T.I.; Lee, S.; Kan, S.Y.; Kang, H.; Kim, B.M.; Kim, J.H.; Lim, J.H. Thymoquinone selectively kills hypoxic renal cancer cells by suppressing hif-1alpha-mediated glycolysis. *Int J Mol Sci* **2019**, *20*.
55. Ding, X.; Zhou, X.; Jiang, B.; Zhao, Q.; Zhou, G. Triptolide suppresses proliferation, hypoxia-inducible factor-1alpha and c-myc expression in pancreatic cancer cells. *Mol Med Rep* **2015**, *12*, 4508-4513.
56. Shan, J.Z.; Xuan, Y.Y.; Zhang, Q.; Huang, J.J. Ursolic acid sensitized colon cancer cells to chemotherapy under hypoxia by inhibiting mdrl through hif-1alpha. *J Zhejiang Univ Sci B* **2016**, *17*, 672-682.
